1 **Title:** Single cell kinetic modeling of redox-based drug metabolism in head and neck  
2 squamous cell carcinoma

3

4 **Authors:** Andrew D. Raddatz<sup>1</sup>, Cristina Furdui<sup>2</sup>, Erik Bey<sup>3</sup>, Melissa L. Kemp<sup>1\*</sup>

5

6 **Affiliations:**

7 <sup>1</sup> Wallace H. Coulter Department of Biomedical Engineering, Georgia Institute of  
8 Technology and Emory University, Atlanta, GA, USA

9 <sup>2</sup> Department of Internal Medicine, Section on Molecular Medicine, Wake Forest School  
10 of Medicine, Winston-Salem, NC, USA

11 <sup>3</sup> Indiana University-Purdue University, Indianapolis, IN, USA

12

13 **Running Title:** Single cell modeling of drug metabolism in HNSCC

14

15 **Keywords:** Head and neck squamous cell carcinoma, scRNA-seq, redox biology, ROS,  
16 systems modeling

17 ***Additional Information***

18 **Corresponding Author:** Melissa L. Kemp. Email: [melissa.kemp@bme.gatech.edu](mailto:melissa.kemp@bme.gatech.edu)

19 **Conflict of Interest Disclosure:** The authors declare no potential conflicts of interests.

20

21

22

## 23 **Abstract**

24 Head and neck squamous cell carcinoma (HNSCC) cells are highly heterogeneous in  
25 their metabolism and typically experience elevated reactive oxygen species (ROS)  
26 levels in the tumor microenvironment. The tumor cells survive under these chronic  
27 oxidative conditions by upregulating antioxidant systems compared to healthy cells.  
28 Radiation and the majority of chemotherapies used clinically for treatment of HNSCC  
29 rely directly or indirectly upon the generation of short-lived ROS to induce cancer cell  
30 death. To investigate the heterogeneity of cellular responses to chemotherapeutic ROS  
31 generation in tumor and healthy tissue, we leveraged single cell RNA-sequencing  
32 (scRNA-seq) data to perform redox systems-level simulations of quinone-cycling  $\beta$ -  
33 lapachone treatment as a source of NQO1-dependent rapid superoxide and hydrogen  
34 peroxide ( $H_2O_2$ ) production. Transcriptomic data from 10 HNSCC patient tumors was  
35 used to populate over 4000 single cell antioxidant enzymatic models. The simulations  
36 reflected significant systems-level differences between the redox states of healthy and  
37 cancer cells, demonstrating in some patient samples a targetable cancer cell population  
38 or in others statistically indistinguishable effects between non-malignant and malignant  
39 cells. Subsequent multivariate analyses between healthy and malignant cellular models  
40 point to distinct contributors of redox responses between these phenotypes. This model  
41 framework provides a mechanistic basis for explaining mixed outcomes of NQO1-  
42 bioactivatable therapeutics despite the tumor specificity of these drugs as defined by  
43 NQO1/catalase expression.

44

45

## 46 **Introduction**

47 Head and neck squamous cell carcinoma (HNSCC) is one of the most prevalent types  
48 of cancer globally (1). Prophylactic measures such as HPV vaccination and the  
49 reduction of alcohol consumption and smoking are improving outcomes; however, five-  
50 year survival rates of HPV-negative HNSCC remain lower than 60% (2). While the  
51 etiology of HNSCC and anatomical locations within the oral cavity epithelial tissue are  
52 diverse, a hallmark of this cancer is elevated oxidative stress (3). Reactive oxygen  
53 species (ROS) at physiological concentrations are important as second messengers for  
54 many signaling processes including the MAPK, PI3K, NF- $\kappa$ B, and HIF pathways (4–8);  
55 however, ROS at higher levels promote tumorigenesis by causing genomic instability  
56 and proliferative signaling (9). If ROS levels are elevated even further, the level of  
57 oxidative stress cannot be managed and cells will go through one of several cell death  
58 mechanisms including necrosis, apoptosis, and ferroptosis (10,11). Cancer cells  
59 manage levels of ROS through multiple antioxidant enzyme systems (12), and under  
60 sustained oxidative stress will transcriptionally upregulate several antioxidant enzymes  
61 via the Keap1-Nrf2 axis (13,14). One treatment strategy is to selectively target cancer  
62 cells through the generation of reactive oxygen species (ROS) and disrupt the delicate  
63 balance these cells have between their higher antioxidant capacity and higher ROS  
64 levels (15–19). A unique approach to this strategy is utilizing NQO1-activatable quinone  
65 drugs to generate ROS. Because NQO1 is a quinone-reducing enzyme that is  
66 upregulated by Nrf2 (20), this approach should selectively target cancer cells that have  
67 constitutive Nrf2 activation. Furthermore, the generation of acute ROS by NQO1-  
68 activatable therapeutics causes a positive feedback response to more NQO1

69 expression, thereby enhancing the lethality of these compounds. Numerous studies  
70 have shown the benefit of these types of drugs alone, and targeting additional  
71 antioxidant and survival systems concurrently can improve the efficacy of the drug (21–  
72 24); however, there is debate as to whether the currently considered metric of  
73 NQO1:catalase expression or activity ratio is useful for identifying tumors susceptible to  
74 NQO1-activatable quinone drugs (25–28). To improve our understanding of the complex  
75 interplay between various antioxidant systems and the production of ROS by NQO1-  
76 activatable drugs, we developed and analyzed a differential equation model based on  
77 enzyme kinetic mechanisms that leverages the diversity of expression levels relevant to  
78 cancer redox systems. Furthermore, we explored potential uses for such a model by  
79 initializing parameter and species values using scRNA-seq data as a way to understand  
80 intratumor and patient variability in response to this type of chemotherapeutic  
81 intervention.

82

## 83 **Methods**

### 84 *Cell Lines and Culture*

85 HNSCC cell lines SCC-61 (Dr. Ralph R. Weichselbaum, The University of Chicago) and  
86 rSCC-61 (29) were cultured in RPMI-1640 cell culture media with L-glutamine (Caisson  
87 Labs, Cat#RPL03) with 10% FBS (Sigma-Aldrich, Cat#F4135) and 1% Pen/Strep  
88 (Caisson Labs, Cat#PSL01) at 37°C and 5% CO<sub>2</sub>. Cell media was changed every other  
89 day and cultures were passaged at 80% confluence and regularly tested for  
90 *Mycoplasma* (MycoAlert PLUS, Lonza, Cat#LT07).

91

92 *siRNA Transfection*

93 3,000 cells were seeded in the wells of a black clear-, flat-bottom 96-well plate (Corning,  
94 Cat#3603). After 24 hours, cells were washed three times with PBS and siRNA  
95 packaged in lipid nanoparticles using the N-TER Nanoparticle siRNA Transfection  
96 System (Sigma-Aldrich, Cat#N2913) was applied to each well at 50 nM in 100  $\mu$ L of  
97 serum-free media for 4 hours. After this, an equal volume of media with 2X FBS (20%)  
98 was added for the remaining 20 hours of transfection. For each gene, three of the top-  
99 performing predesigned MISSION siRNA constructs from Sigma-Aldrich were pooled  
100 and transfected concurrently. The transfection efficiency of these siRNAs against  
101 GAPDH has been performed previously (30) via Western Blot, and we repeated similar  
102 validation Western Blots with the pooled siRNAs against NQO1, a critical enzyme within  
103 our system (Figure S1). After 24 hours of transfection by siRNA, cells were washed  
104 three times with PBS and further experiments performed.

105

106  *$\beta$ -Lapachone Treatment Response  $H_2O_2$  Measurements*

107 Following siRNA transfection and PBS washes, Amplex Red and Horseradish  
108 Peroxidase (HRP) (Thermo Fisher Scientific, Cat#A2188) were added to the wells and  
109 kinetic fluorescent reads of resorufin (excitation 571 nm, emission 585 nm), the product  
110 of Amplex Red and  $H_2O_2$  in the presence of HRP, were taken to measure  $H_2O_2$  over  
111 time. After 10 minutes of reads to determine baseline extracellular concentrations of  
112  $H_2O_2$ , 3  $\mu$ M of  $\beta$ -Lapachone (synthesized in Boothman Lab, Indiana University) was  
113 applied to cells in serum-free media and reads were taken for 2 hours.

114

115 *Ordinary Differential Equation Model Construction*

116 The redox system ODE model was built upon a previously published model originally  
 117 developed to describe the H<sub>2</sub>O<sub>2</sub> clearance within Jurkat T cells in response to a bolus of  
 118 extracellular H<sub>2</sub>O<sub>2</sub> addition (12). The additional species included in new reactions are:  
 119 oxidized extracellular β-lapachone (β-lap<sup>ext</sup>), intracellular O<sub>2</sub><sup>•-</sup>, oxidized intracellular β-  
 120 lapachone (β-lapQ), reduced intracellular β-lapachone (β-lapHQ), semioxidized  
 121 intracellular β-lapachone (β-lapSQ), and glutathionylated intracellular β-lapachone (β-  
 122 lap-GSH). New reaction rate terms are provided in Table 1. Supplemental Tables 1 and  
 123 2 list the complete parameters and initial values, respectively, used within the ODE  
 124 system which were updated from the model originally characterized for Jurkat cells (12).

**Table 1.**

| Reaction Name                      | Rate Term                                                               |
|------------------------------------|-------------------------------------------------------------------------|
| β-lap permeation*                  | $k_{34} * A^{cells} * ([\beta\text{-lap}^{ext}] - [\beta\text{-lapQ}])$ |
| β-lap reduction                    | $k_{29} * [\beta\text{-lapQ}] * [\text{NADPH}]$                         |
| β-lap semioxidation                | $k_{30} * [\beta\text{-lapHQ}] * [\text{O}_2]$                          |
| β-lap oxidation                    | $k_{31} * [\beta\text{-lapSQ}] * [\text{O}_2]$                          |
| superoxide dismutase               | $k_{32} * [\text{O}_2^{\bullet-}]^2$                                    |
| β-lap semireduction                | $k_{33} * [\beta\text{-lapQ}] * [\text{NADPH}]$                         |
| β-lap glutathionylation            | $k_{35} * [\beta\text{-lapHQ}] * [\text{GSH}]$                          |
| Glutathionylated β-lap permeation* | $k_{36} * A^{cells} * [\beta\text{-lapHQ-SG}]$                          |

125 \*Permeation rate terms are divided by respective compartment volumes

126 ODEs were solved with ode15s in MATLAB R2020b, using a max timestep of 1 second.

127

## 128 *Sensitivity Analysis*

129 Sensitivity values were calculated by increasing or decreasing parameter values by  
130 10%, running the ODE solver for a simulated 2 hours, and using the following formula.

$$131 \quad S_{i,j}(t) = \frac{\partial x_i(t)}{\partial k_j}$$

132

## 133 *scRNA-seq Data Analysis*

134 HNSCC scRNA-seq data was collected from the gene expression omnibus (GEO  
135 Accession: GSE103322). This data had already been preprocessed to exclude cells  
136 with fewer than 2,000 genes detected or an average expression level below 2.5 of a  
137 curated list of housekeeping genes (31,32). Of the data from 18 patients, we retained  
138 the 10 patients that contained the most malignant cell transcriptomes as previously  
139 performed (31,33). t-SNE dimensional reduction was performed using the scikit-learn  
140 python library with default parameters besides PCA initialization. Enzyme abundance  
141 calculations from scRNA-seq data was performed as previously described (30). Briefly,  
142 kinetic rate constants from a mechanistic model of RNA production, RNA degradation,  
143 protein production, and protein degradation were used to determine equilibrium protein  
144 abundances given RNA levels. For proteins where these rate constants were not given,  
145 linear regression between RNA and protein was used to estimate protein abundance.  
146 Partial least squares regression (PLSR) was performed with log-transformed and zero-  
147 mean unit variance standardized data in SIMCA. Plots were generated using Seaborn  
148 and Matplotlib python libraries. The kernel density estimate plot was generated with  
149 default parameters using `seaborn.kdeplot()`. Scipy was used to conduct the Welch's t  
150 tests with `stats.ttest_ind()` and `equal_variance` set to False.

## 151 **Results**

### 152 *A systems level model of ROS generation by quinone cycling*

153 We developed our model system to encompass three main aspects: 1) sets of critical  
154 H<sub>2</sub>O<sub>2</sub>-stabilizing antioxidant systems; 2) metabolism of the xenobiotic drug  $\beta$ -lapachone;  
155 and 3) the permeation of key species across membranes of the cell, including organelle-  
156 specific transport. We assumed that mitochondrial ROS production would remain  
157 constant due to basal respiratory metabolism, and mitochondrial antioxidant systems  
158 were not included, nor did we factor in activation of NADPH oxidases as a source of  
159 ROS as the consumption of NADPH by NQO1-catalyzed cycling of  $\beta$ -lapachone would  
160 render the NADPH oxidases inactive. Another assumption made was that due to high  
161 catalytic rates of NQO1 and antioxidant enzymes, 2 hours of simulated time was  
162 sufficient to capture the dynamics of the system. The relatively short period of simulated  
163 time allowed us to ignore transcriptional and translational regulation, such as how  
164 increased cellular oxidation would trigger Nrf2 nuclear translocation and upregulation of  
165 antioxidant genes including NQO1; therefore, total enzyme concentrations were  
166 assumed constant. The system and directionality of reactions and transport are shown  
167 in Figure 1.



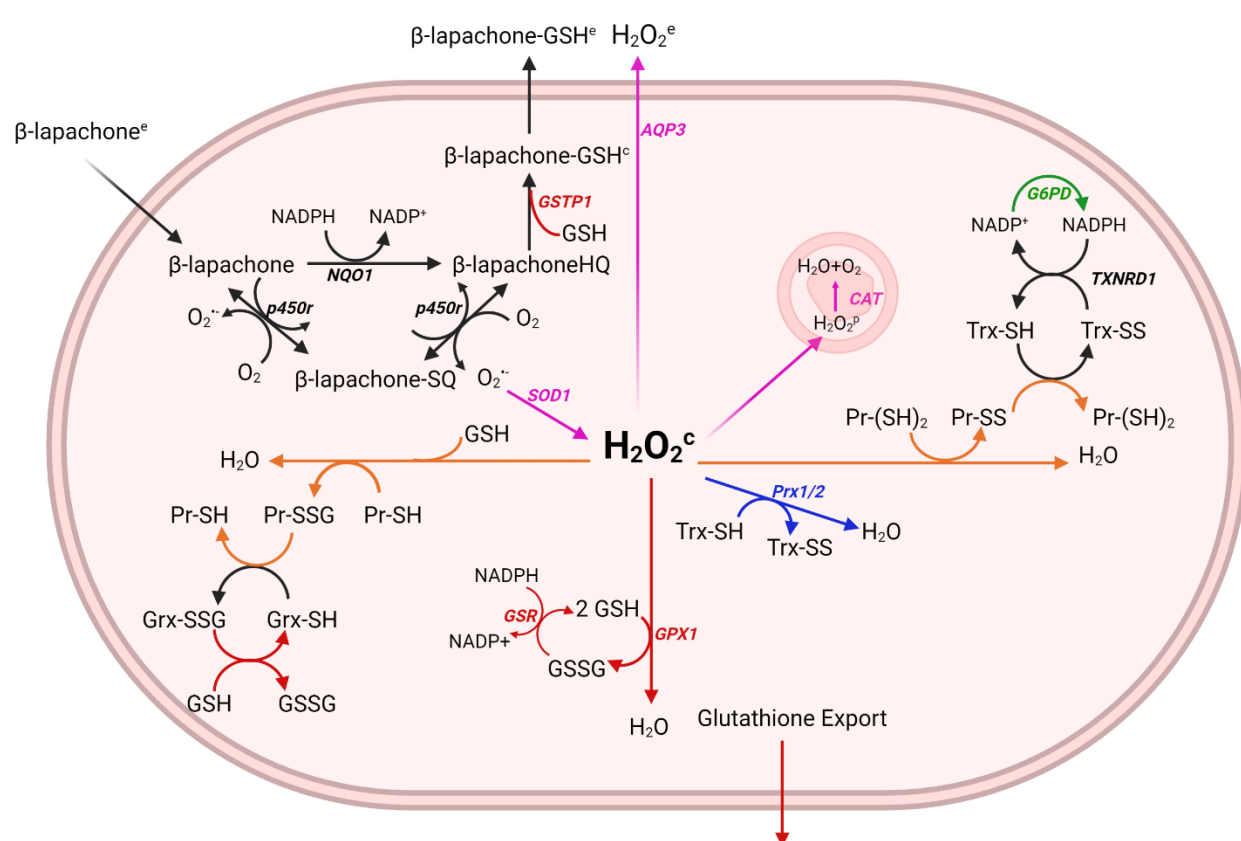

168

169 **Figure 1.** Generation of a relevant model of drug metabolism and hydrogen peroxide  
 170 clearance pathways. The metabolism of  $\beta$ -lapachone by NQO1 results in the generation  
 171 of superoxide ( $O_2^{\cdot-}$ ) and the oxidation of NADPH. Superoxide dismutase 1 (SOD1) in  
 172 the cytosol converts the superoxide to hydrogen peroxide ( $H_2O_2$ ) which is converted to  
 173 water and oxygen by antioxidant systems including the  
 174 peroxiredoxin/thioredoxin/thioredoxin reductase/sulfiredoxin system, the glutathione  
 175 peroxidase/glutathione/glutathione reductase system, catalase, and the oxidation of free  
 176 protein thiols. NADPH often serves as the reductant for cycling these antioxidant  
 177 enzymes and it is used to reduce  $\beta$ -lapachone, thus canonical metabolic reactions  
 178 involved in the production of NADPH are also included, such as glucose-6-phosphate-  
 179 dehydrogenase (G6PD).  
 180

181 *Head and neck squamous cell carcinoma cells exhibit heterogeneity of redox gene*  
182 *expression*

183 We sought to understand how variation in redox profiles of *in vivo* HNSCC tumors may  
184 reflect the distributed control of H<sub>2</sub>O<sub>2</sub> clearance in tumor cells. To take advantage of  
185 new highly resolved omics technologies that provide rich tumor characterization, we  
186 analyzed scRNA-seq data from 10 HNSCC patients originally collected by Puram et al  
187 (31). In this dataset, there is a varying degree of cell type representation from each  
188 patient, likely due to both cross-patient tumor microenvironment heterogeneity and  
189 preprocessing of scRNA-seq reads for quality control. After splitting the dataset into  
190 malignant and non-malignant cells and reducing the variables to just 35 redox genes  
191 represented in our quinone cycling systems model, t-SNE clustering revealed malignant  
192 cells tend to cluster by patient (Figure 2a), suggesting that there are distinct, patient-  
193 based tumor redox profiles. We observed after clustering that tumors across patients  
194 have overall similar NQO1 levels, but that individual tumors display heterogeneity with  
195 respect to the distribution of cells expressing higher NQO1 (Figure 2b). This  
196 heterogeneity can also be observed when inspecting TXNRD1 and GLUD1 expression  
197 (Figures 2c, 2d). With this knowledge of heterogeneity between and within patient  
198 tumors, we leveraged redox transcriptional profiles per cell per patient to explore  
199 potential ROS buildup on cell- and tumor-based scales.

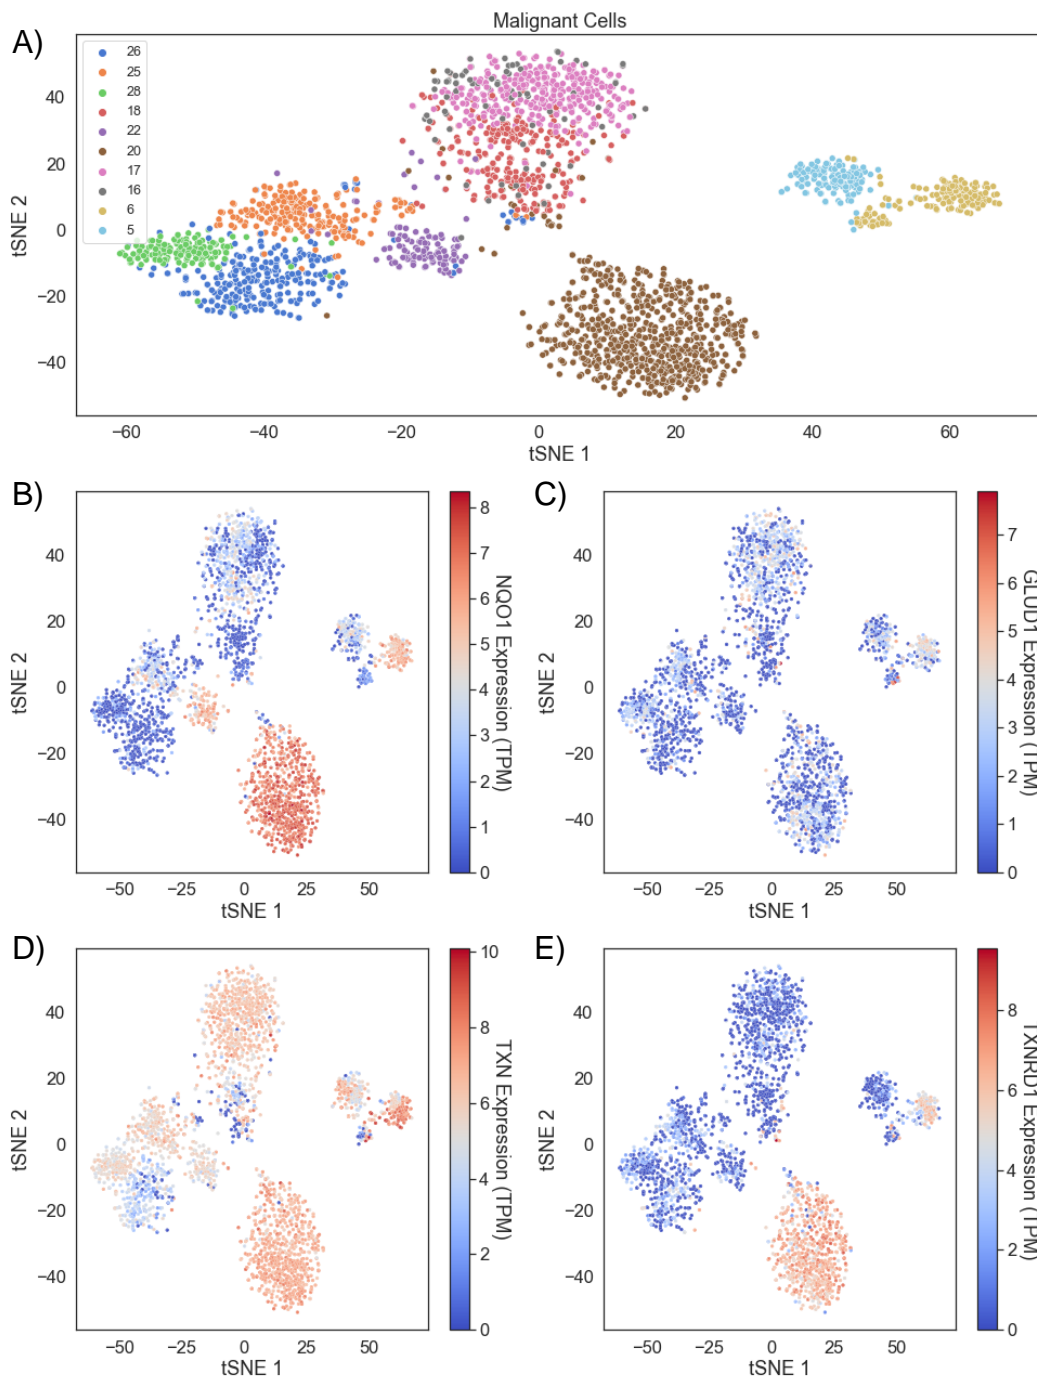

200

201 **Figure 2. Head and neck cancers demonstrate intratumor and intertumor redox**

202 **heterogeneity.** Figure 2. Head and neck cancers demonstrate intratumor and

203 intertumor redox heterogeneity. A) Malignant cells from 10 HNSCC patients cluster

204 *together based on redox profiles. B) Clusters colored by NQO1, C) GLUD1, D) TXN,*  
205 *and E) TXNRD1 expression.*

206

207 *Initializing single cell ODE models with scRNA-seq*

208 While scRNA-seq data has been widely used for exploratory data analysis and to  
209 understand gene expression correlations within developing tissues and cancer, this  
210 form of characterization has only recently been used to inform mechanistic kinetic  
211 models (34). We generated unique cell-based ODE systems using the previously  
212 analyzed scRNA-seq data. With the redox transcriptional profiles of almost 5000 cells  
213 from 10 patients, we first estimated the redox protein profiles as previously described  
214 (30,35) and imported these protein concentrations and related rate constants into our  
215 ODE model followed by simulation of the redox metabolism for each cell undergoing  
216 acute ROS generation by  $\beta$ -lapachone treatment. Specifically, AQP3, GSR, TXNRD1,  
217 NQO1, SOD1, POR, G6PD, and GLUD1 expression levels were used to adjust reaction  
218 rate constants by multiplying the rate constants by the percent change in the single cell  
219 expression from the average. G6PD and GLUD1 both generate NADPH and were  
220 combined into a single reaction in the model. GPX1, CAT, PRX1, PRX2, TXN, and  
221 GLRX expression levels were used to estimate initial enzyme abundances. PRX1 and  
222 PRX2 expression levels were combined and represent a single reaction in the model.  
223 All other parameters and species levels were kept from prior modeling (12).

224

225 *Sensitivity analysis shows  $H_2O_2$  production is insensitive to individual enzymatic*  
226 *parameters*

227 After constructing the ODE system, we sought to understand how influential each  
 228 simulation parameter was on our system by performing a sensitivity analysis. We  
 229 assessed the effect on intracellular  $H_2O_2$  as the output variable of interest by altering  
 230 model parameters up or down 10%. With sensitivities remaining below 1 and  $H_2O_2$  only  
 231 being somewhat sensitive to several parameters, we concluded that no single  
 232 parameter could alter the  $H_2O_2$  production significantly (Figure 3a).

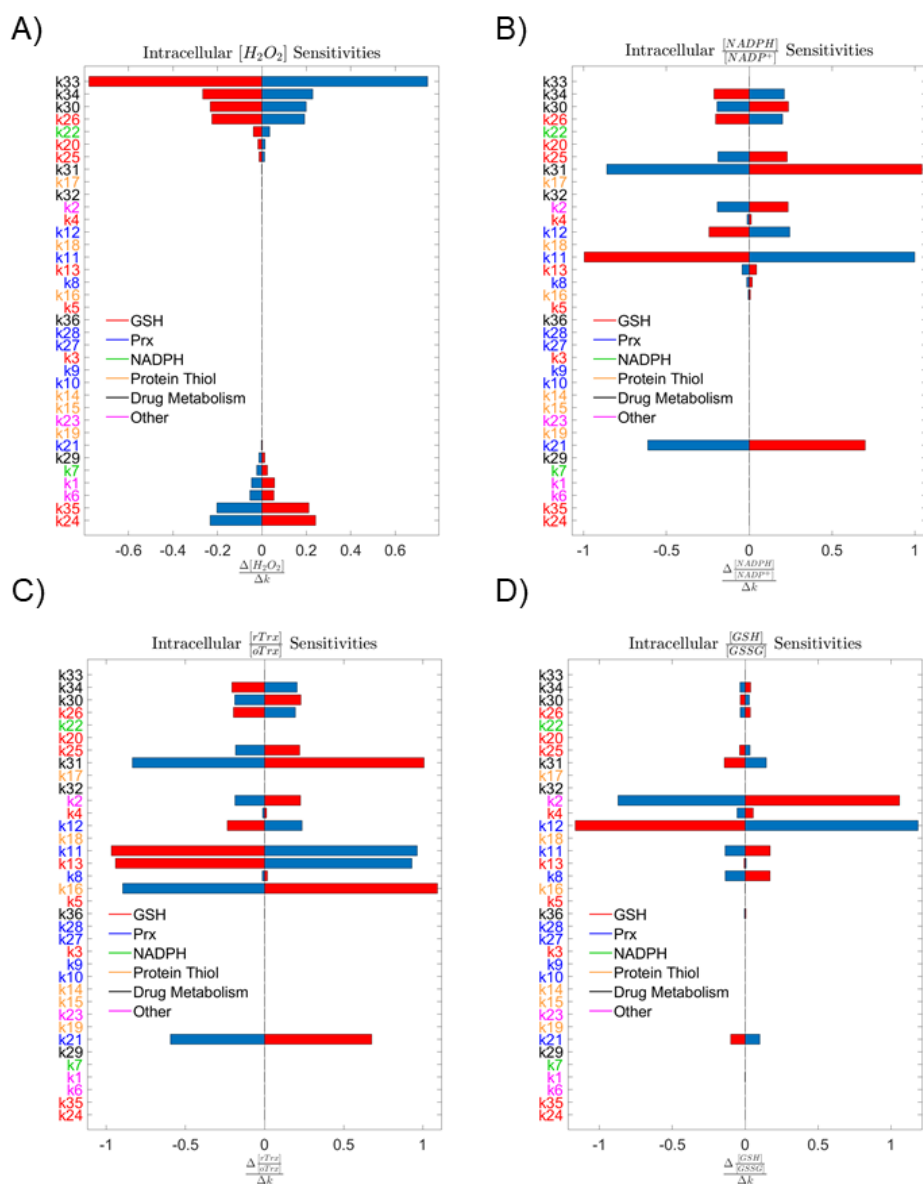

234 **Figure 3. Sensitivity analyses.** A) Analysis of system sensitivity to single parameter  
235 10% perturbations colored by antioxidant subsystem shows low sensitivity of A)  
236 intracellular  $H_2O_2$ , B) NADPH:NADP<sup>+</sup>, C) Trx-SH:Trx-SS, and D) GSH:GSSG at 2 hours  
237 to any single parameter.

238  
239 Parameter labels colored by antioxidant subsystem also indicate no single antioxidant  
240 system is controlling a majority of the  $H_2O_2$  scavenging load. Expanding the number of  
241 outcomes to include redox ratios of reduced glutathione to oxidized glutathione, reduced  
242 thioredoxin to oxidized thioredoxin, and NADPH to NADP<sup>+</sup> allowed us to assess the  
243 impact of these parameters on alternative indicators of redox status within the cell. The  
244 distribution of parameter importance in the sensitivity analyses across multiple redox  
245 mechanisms suggests that the reductive capacity of a cell is robust, and no single  
246 antioxidant enzyme system is predominantly responsible for clearance of  $H_2O_2$  (Figure  
247 3b-d).

248  
249 *Experimental knockdown of antioxidant enzymes confirms model sensitivities*  
250 To experimentally validate the model, we used siRNA to perturb antioxidant enzyme  
251 levels and then observed the knockdown effect on acute  $H_2O_2$  production induced by  
252  $\beta$ -lapachone over a 100 minute period (Figure 4a). We confirmed via NQO1 Western  
253 blots that 24 hours of siRNA exposure leads to approximately 50% knockdown of  
254 expressed protein (Figure S1). We also probed NQO1 after silencing Nrf2 and PRDX1  
255 and observed changes in NQO1 expression (Figure S1), suggesting either a global siRNA  
256 impact on ROS-related protein expression as demonstrated by Kippner et al. (36) or an

257 indirect, downstream effect of these proteins on overall redox state. One possibility is that  
258 lowering Nrf2 and PRDX1 can increase basal ROS levels resulting in the production of  
259 antioxidant enzymes such as NQO1 through other mechanisms. After confirming pooled  
260 siRNA silencing, we knocked down a set of antioxidant or antioxidant-related enzymes  
261 including CAT, GPX1, GPX4, SOD1, GSR, PRDX1, TXN, TXNRD1, GLUD1, and G6PD  
262 to explore their impact on H<sub>2</sub>O<sub>2</sub> production during  $\beta$ -lapachone treatment. We  
263 hypothesized that knockdown of antioxidants would result in an increase in H<sub>2</sub>O<sub>2</sub>, while  
264 knockdown of NQO1 would reduce drug metabolism and therefore H<sub>2</sub>O<sub>2</sub> levels with  $\beta$ -  
265 lapachone treatment would be lower. We used Amplex Red to probe extracellular H<sub>2</sub>O<sub>2</sub>  
266 levels over the course of 2 hours of drug treatment and compared the fold change in H<sub>2</sub>O<sub>2</sub>  
267 relative to control scrambled siRNA (Figure 4b,c). With the maximum fold change no  
268 greater than 30% and relatively large standard deviation, these single knockdowns did  
269 not impact the redox state of the cells significantly by Welch's t test, confirming our  
270 simulated parameter sensitivities.

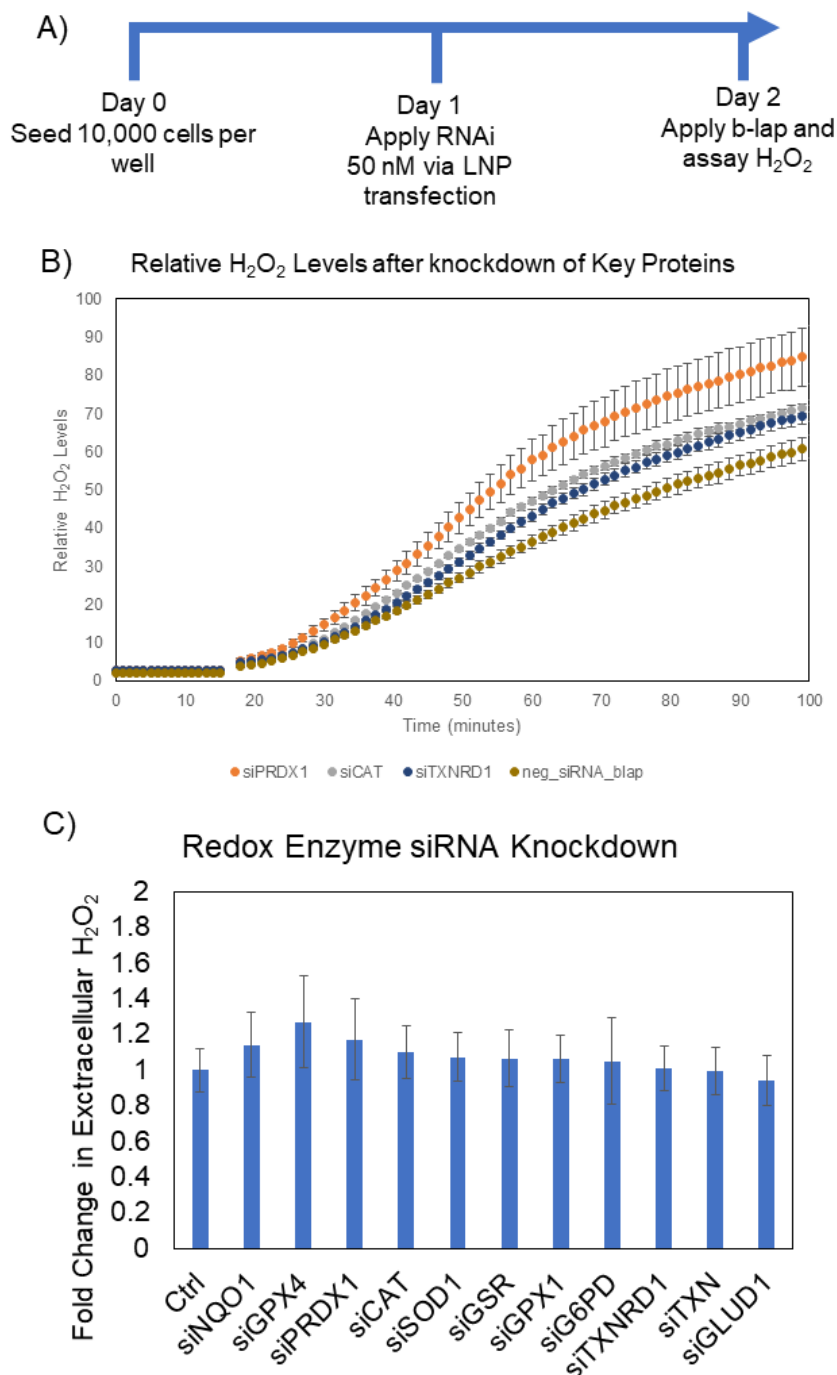

271  
272 **Figure 4. siRNA perturbation studies validate sensitivity analyses.** A) siRNA  
273 knockdown workflow. B) Kinetic reads of H<sub>2</sub>O<sub>2</sub> for PRDX1, CAT, and TXNRD1 enzyme  
274 knockdowns in a representative experiment showing increase in H<sub>2</sub>O<sub>2</sub> after antioxidant  
275 knockdown (mean +/- s.d.). C) Aggregated fold change in H<sub>2</sub>O<sub>2</sub> at 2 hours for each



276 *antioxidant knockdown shows limited increase in H<sub>2</sub>O<sub>2</sub> confirming computational*  
277 *sensitivity analyses (mean +/- s.d).*

278  
279 *Comparison of H<sub>2</sub>O<sub>2</sub> accumulation in healthy and cancer cells identifies patients with*  
280 *greatest potential for targeted therapy*

281 Using this new system of generating single cell ODE models, the redox profiles of  
282 individual cells within HNSCC can vary greatly and result in a range of H<sub>2</sub>O<sub>2</sub> spanning  
283 many orders of magnitude. After removing simulations that were unstable, we had 4,260  
284 single cell simulation outputs across all ten patients. All of the ten patients showed a  
285 trend of more H<sub>2</sub>O<sub>2</sub> generated by the malignant cells relative to the normal cells, with six  
286 patients exhibiting a statistical difference (Figure 5a).

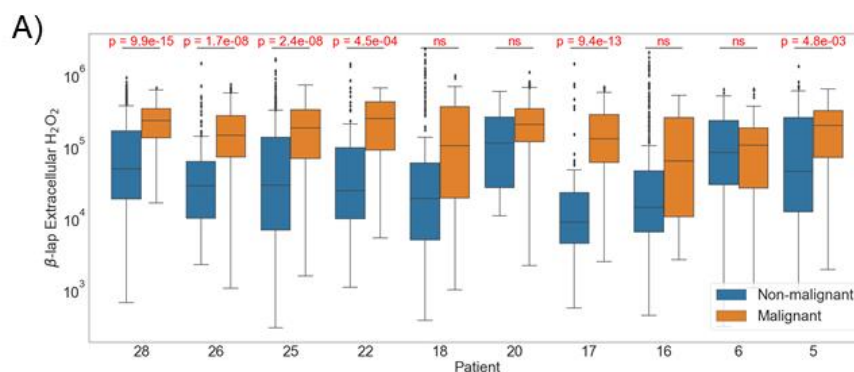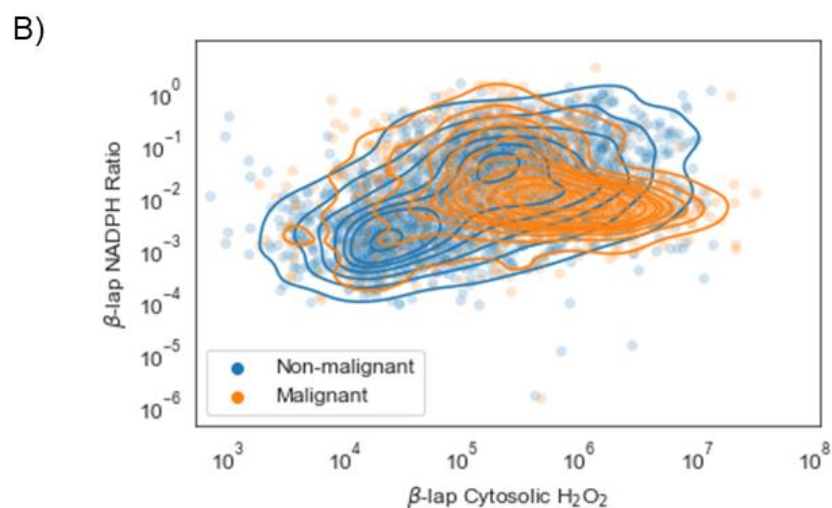

287

288 **Figure 5. Model results using single cell gene expression values.** A) Differences  
289 between extracellular  $H_2O_2$  in healthy and malignant cells under  $\beta$ -lapachone by  
290 patient. B) Differences between NADPH:NADP<sup>+</sup> ratio and extracellular  $H_2O_2$  in healthy  
291 and malignant cells under  $\beta$ -lapachone.

292  
293 Additionally, when comparing both  $H_2O_2$  output and endpoint NADPH:NADP<sup>+</sup> ratios  
294 across the 4,260 cellular models, we generally see higher  $H_2O_2$  levels in cancer cells  
295 but no trend in NADPH:NADP<sup>+</sup> ratios (Figure 5b). This shift demonstrates a potential for  
296 using single cell profiling to select patients for treatment with this targeted  
297 chemotherapy based on their redox profile. For the four patients where treatment  
298 induced  $H_2O_2$  in both healthy and malignant cells without a statistically significant  
299 difference, the therapy may induce normal tissue toxicity impacting treatment and long-  
300 term quality of life.

301  
302 *Initializing single cell ODE models with scRNA-seq identifies proteins correlated with*  
303  *$H_2O_2$  production*  
304  $H_2O_2$  concentrations and glutathione redox ratios after a 2 hour simulation were  
305 collected and used in partial least squares regression to probe the correlations between  
306 the protein concentrations within the model and the four output variables. With 7 and 6  
307 components, respectively, both the malignant and non-malignant regression models are  
308 able to achieve both high explained output variance (non-malignant  $R^2Y = 0.672$ ,  
309 malignant  $R^2Y = 0.689$ ) and goodness of prediction (non-malignant  $Q^2 = 0.656$ ,  
310 malignant  $Q^2 = 0.672$ ). VIP scores identify NQO1, POR, TXNRD1, AQP3, and G6PD as

311 the most important variables in the malignant model (Figure 6a) and POR, GLUD1,  
 312 TXNRD1, NQO1, and GPX1 as the most important variables in the non-malignant  
 313 model (Figure 6b).

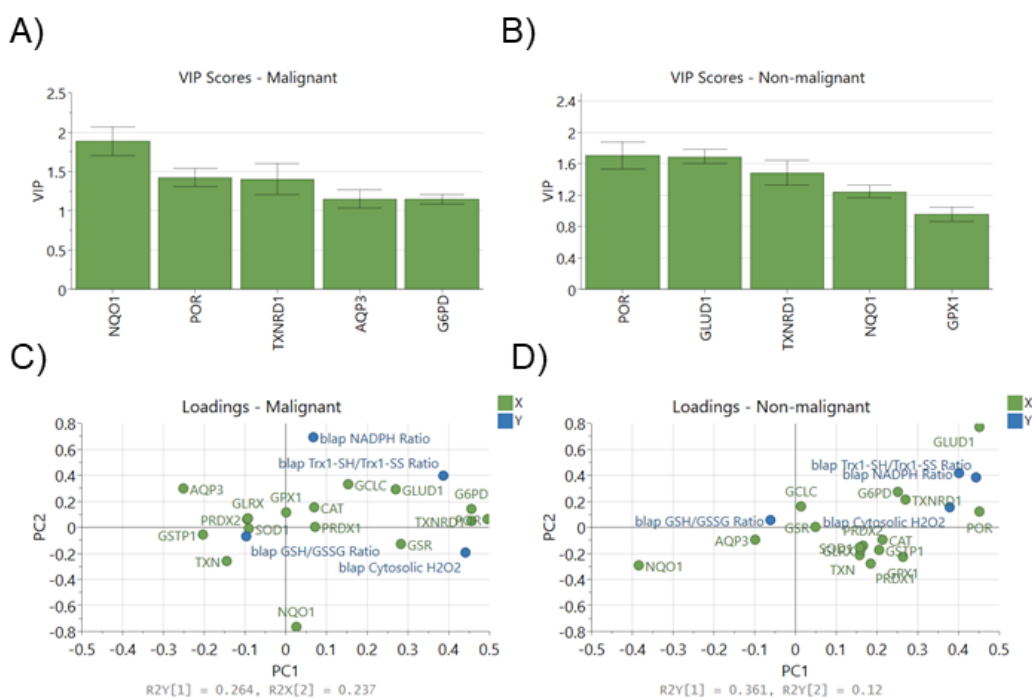

314  
 315 **Figure 6.** Partial least squares regression VIP scores and loadings. A) Genes with top  
 316 5 VIP scores in PLSR model in malignant simulations and B) non-malignant simulations.  
 317 C) Breakdown of output into individual variables and loadings for each X and Y variable  
 318 in malignant PLSR model and D) non-malignant PLSR model.

319  
 320 Collectively, the distribution of redox enzymes across principal components 1 and 2  
 321 differ between the two statistical models (Figure 6c,d). The distribution of NQO1 and  
 322 CAT loadings in latent space reflects prior reports of NQO1/CAT as a useful metric in  
 323 explaining the lack of  $\beta$ -lapachone lethality in non-cancerous tissues albeit not  
 324 reflecting LD50 values across a diverse HNSCC panel (21). Additionally, the importance

325 of POR demonstrates how the alternative path for  $\beta$ -lapachone reduction can still lead  
326 to significant superoxide production and therefore higher levels of H<sub>2</sub>O<sub>2</sub>. Expression of  
327 thioredoxin reductase 1 (TXNRD1) and NADPH-producing enzymes GLUD1 and G6PD  
328 are correlated with reduced thioredoxin levels, and most other antioxidant enzyme  
329 expression levels are less important due to low magnitude of their loading weights, i.e.  
330 proximity to the origin (Figure 6c,d).

331

## 332 **Discussion**

333 Because the main mechanism of action by NQO1-activatable drugs is the generation of  
334 ROS, the ability for a cancer cell to manage ROS is a critical metric for  
335 chemotherapeutic response. NQO1:CAT ratio has been proposed as a predictive  
336 variable of NQO1-activatable drug success, but the utility of this metric is debated. Bey  
337 et al. in 2013 first speculated that NQO1:CAT could be useful after finding the use of  
338 exogenous catalase reduced the effects of  $\beta$ -lapachone in breast cancer (25), and  
339 higher NQO1:CAT were observed in NSCLC tumors that responded to treatment than in  
340 matched healthy tissue (26). In 2017 it was reported that the LD50 of  $\beta$ -lapachone did  
341 not correlate with NQO1:CAT in head and neck cancer (21). Additionally, while  
342 NQO1:CAT was not directly measured, inhibition of catalase and GSH did not lead to a  
343 sensitization of KEAP1-mutated NSCLC during  $\beta$ -lapachone treatment while inhibition  
344 of TXNRD and SOD1 sensitized cancers (28). A recent TCGA analysis revealed higher  
345 NQO1:CAT levels in hepatocellular carcinoma (HCC) than in matched healthy tissue,  
346 and the authors reported that the high NQO1 patient cohort had lower survival (37).  
347 These studies serve to highlight the complexity of the antioxidant system in the context

348 of NQO1-activatable drugs like  $\beta$ -lapachone, and suggest the current approach for  
349 identifying how well a cancer would respond to the treatment is underdeveloped. In this  
350 report, we generated a more accurate model of ROS generation and scavenging under  
351  $\beta$ -lapachone conditions by including additional antioxidant systems in an ODE-based  
352 approach in which  $H_2O_2$  generation is a surrogate for drug potency. Including additional  
353 antioxidant systems and the kinetic information of enzymes simultaneously allowed us  
354 to predict measures other than NQO1:CAT that can serve as an indication of  
355  $\beta$ -lapachone success.

356 When building a model to represent a biological system, there are always  
357 simplifications and assumptions that must be made using field expertise. Transcriptional  
358 regulation of the Keap1-Nrf2 axis on the scale of hours to days is not accounted for, in  
359 which the positive feedback of  $H_2O_2$  activation of Nrf2-targeted genes results in  
360 enhanced NQO1 expression (14,38). Another major assumption used was that  
361 mitochondrial antioxidant systems would not reduce the large amount of ROS in this  
362 chemotherapeutic context due to the cytosolic location of NQO1 (39). Work done by Ma  
363 et al. shows that mitochondrial-targeted  $\beta$ -lapachone produces mitochondrial ROS using  
364 MitoSOX, while 3-hydroxy  $\beta$ -lapachone which is not mitochondrially targeted produces  
365 no substantial mitochondrial ROS (40). This allowed us to omit antioxidant enzymes  
366 expressed in the mitochondria such as SOD2, PRDX3, PRDX5. We did, however, find  
367 relatively high sensitivities of  $H_2O_2$  permeabilities in the model, indicating the importance  
368 of how quickly a cell can export ROS during treatment. While  $H_2O_2$  can passively diffuse  
369 through the phospholipid bilayer, it is also known to utilize aquaporin membrane  
370 proteins to travel through the plasma membrane (41–44). Because of the high

371 sensitivities, measuring aquaporin expression levels could serve as a useful indicator of  
372  $\beta$ -lapachone success.

373 When generating enzymatic models, direct expression levels of proteins can be  
374 acquired experimentally or from published datasets of other scientists' experiments. We  
375 chose an alternative strategy by estimating protein abundance based on the scRNA-seq  
376 mRNA levels. Because transcriptional levels do not directly correlate to protein levels,  
377 we used a quantitative pipeline to estimate protein abundances that leverages  
378 previously published data from Schwanhausser et al (30,35). This allowed us to  
379 generate an ODE system specific to each cell sequenced in the scRNA-seq data. From  
380 our initial exploration of the scRNA-seq data, we observed the cells cluster by patient  
381 regardless of if they were healthy or cancerous similar to the results of an analysis  
382 conducted by Xiao et al. (33), so we concluded that each tumor was composed of a  
383 population of cells that were similar in redox profile. Yet when analyzing the expression  
384 of each antioxidant enzyme within these clusters, the overall antioxidant capacity or  
385 diversity of each tumor was unclear due to varied levels of each antioxidant enzyme.  
386 Our ODE model was able to stratify the patient tumors based on the differences in the  
387 expected response of healthy and cancerous cells to  $\beta$ -lapachone, shedding some light  
388 on the complex nature of redox systems. Because we used scRNA-seq data that had  
389 transcriptomes of both normal and cancerous cells, we were able to assess the relative  
390 dependence of these two cell populations on their antioxidant enzyme expression under  
391 oxidative stress. When the contours of the two cell populations are plotted in a 2D  
392 phase space of the two output variables, extracellular  $H_2O_2$  and NADPH ratio, we find  
393 these overlap quite closely, but the cancer cell range is more compact. This suggests

394 the cancer cell antioxidant phenotype can lead to a more controlled range of  
395 concentrations of ROS and reducing cofactors in oxidative environments, which can be  
396 seen as a survival advantage of the cancer cells. Similarly, while our comparisons of  
397 healthy and cancerous cells' redox state after treatment were of the aggregated  
398 samples in each population per patient, there is wide variability within each group and  
399 some healthy cells show a more oxidatively stressed state than cancerous cells in the  
400 same tumor. The healthy cells represent a repertoire of components found in the tumor  
401 microenvironment ranging from fibroblasts to macrophages, and thus a diversity of  
402 responses to an oxidative insult is expected. While cancer cells are typically seen as  
403 being more oxidized, these results predict that tumor heterogeneity assessed at a single  
404 cell resolution can potentially challenge narratives established using bulk-based  
405 characterization.

406 A current issue with scRNA-seq data is a large volume of dropouts which leads to  
407 imputed values that are not true data (45). Methods for both higher quality sequencing  
408 and imputation are being developed, and as higher quality datasets are published this  
409 model can be updated to reflect that (46,47). Additionally, the added value of spatial  
410 information from new spatial omics technologies could further improve the model. With  
411 the model currently representing a single cell system, a multicellular model of all of the  
412 cells simultaneously with physical parameters included could better represent the tumor  
413 system and buildup and breakdown of ROS. Lastly, our model only predicts how these  
414 cells within patient samples would respond to  $\beta$ -lapachone. Working with directly  
415 validated samples is a more ideal workflow, and we look forward to testing these  
416 models' accuracies if clinical data is made available in the future.

417        Altogether, this analysis demonstrates that developing a comprehensive enzymatic  
418 model of ROS generation and clearance using scRNA-seq data has the potential to  
419 identify the relative importance of various axes in the complex antioxidant network. We  
420 suggest that metrics other than NQO1:CAT should be considered when characterizing a  
421 HNSCC tumor and its capacity to respond to  $\beta$ -lapachone. These metrics include  
422 expression of TXNRD1, POR, and NADPH-producing enzymes such as G6PD and  
423 GLUD1. Ultimately, the systems approach outlined here demonstrates the value of  
424 utilizing mechanistic modeling in conjunction with omics data to attain a more  
425 comprehensive understanding of the cellular redox state.

## 426 **References**

- 427 1. R.L. Siegel, K.D. Miller, H.E. Fuchs, A. Jemal, Cancer statistics, 2022, CA: A  
428 Cancer Journal for Clinicians 72 (2022) 7-33.
- 429 2. H. Li, S.J. Torabi, W.G. Yarbrough, S. Mehra, H.A. Osborn, B. Judson,  
430 Association of human papillomavirus status at head and neck carcinoma subsites  
431 with overall survival, JAMA Otolaryngology - Head and Neck Surgery 144 (2018)  
432 519-525.
- 433 3. S. Shen, Z. Yan, J. Wu, X. Liu, G. Guan, C. Zou, Q. Guo, C. Zhu, T. Liu, C. Chen,  
434 L. Chen, P. Cheng, W. Cheng, A. Wu, Characterization of ROS Metabolic  
435 Equilibrium Reclassifies Pan-Cancer Samples and Guides Pathway Targeting  
436 Therapy, Frontiers in Oncology 10 (2020) 581197.
- 437 4. Y. Son, Y.K. Cheong, N.H. Kim, H.T. Chung, D.G Kang, H.O. Pae, Mitogen-  
438 Activated Protein Kinases and Reactive Oxygen Species: How Can ROS Activate  
439 MAPK Pathways?, Journal of Signal Transduction 2011 (2011) 792639.



- 440 5. S.A. Best, D.P. de Souza, A. Kersbergen, A.N. Policheni, S. Dayalan, D. Tull, V.  
441 Rathi, D.H. Gray, M.E. Ritchie, M.J. McConville, K.D. Sutherland, Synergy  
442 between the KEAP1/NRF2 and PI3K Pathways Drives Non-Small-Cell Lung  
443 Cancer with an Altered Immune Microenvironment, *Cell Metabolism* 27 (2018)  
444 935-943.
- 445 6. N. Koundouros, G. Poulogiannis, Phosphoinositide 3-Kinase/Akt Signaling and  
446 Redox Metabolism in Cancer, *Frontiers in Oncology* 8 (2018) 160.
- 447 7. K. Johansson, M. Cebula, O. Rengby, K. Dreij, K.E. Carlström, K. Sigmundsson,  
448 F. Piehl, E.S.J. Arner, Cross Talk in HEK293 Cells between Nrf2, HIF, and NF- $\kappa$ B  
449 Activities upon Challenges with Redox Therapeutics Characterized with Single-  
450 Cell Resolution, *Antioxidants and Redox Signaling* 26 (2017) 229-246.
- 451 8. S. Movafagh, S. Crook, K. Vo, Regulation of hypoxia-inducible factor-1a by  
452 reactive oxygen species: new developments in an old debate, *J. Cell. Biochem.*  
453 116 (2015) 696-703.
- 454 9. S. Emanuele, A. D'Anneo, G. Calvaruso, C. Cernigliaro, M. Giuliano, M.  
455 Lauricella, The Double-Edged Sword Profile of Redox Signaling: Oxidative Events  
456 As Molecular Switches in the Balance between Cell Physiology and Cancer,  
457 *Chemical Research in Toxicology* 31 (2018) 201-210.
- 458 10. M.A. Badgley, D.M. Kremer, H.C. Maurer, K.E. DelGiorno, H.J. Lee, V. Purohit,  
459 I.R. Sagalovskiy, A. Ma, J. Kapilian, C.E.M. Firl, A.R. Decker, S.A. Sastra, C.F.  
460 Palermo, L.R. Andrade, P. Sajjakulnukit, L. Zhang, Z.P. Tolstyka, T. Hirschhorn,  
461 C. Lamb, T. Liu, W. Gu, E.S. Seeley, E. Stone, G. Georgiou, U. Manor, A. Iuga,

- 462 G.M. Wahl, B.R. Stockwell, C.A. Lyssiotis, K.P. Olive, Cysteine depletion induces  
463 pancreatic tumor ferroptosis in mice, *Science* 368 (2020) 85-89.
- 464 11. T.M. Seibt, B. Proneth, M. Conrad, Role of GPX4 in ferroptosis and its  
465 pharmacological implication, *Free Radical Biology and Medicine* 133 (2019) 144-  
466 152.
- 467 12. N.J. Adimora, D.P. Jones, M.L. Kemp, A Model of Redox Kinetics Implicates the  
468 Thiol Proteome in Cellular Hydrogen Peroxide Responses, *Antioxidants & Redox  
469 Signaling* 13 (2010) 731-743.
- 470 13. E.W. Cloer, D. Goldfarb, T.P. Schrank, B.E. Weissman, M.B. Major, Nrf2  
471 activation in cancer: From DNA to protein, *Cancer Research* 79 (2019) 889-898.
- 472 14. E. Panieri, P. Telkoparan-Akillilar, S. Suzen, L. Saso, The NRF2/KEAP1 Axis in  
473 the Regulation of Tumor Metabolism: Mechanisms and Therapeutic Perspectives,  
474 *Biomolecules* 10 (2020) 791.
- 475 15. I.S. Harris, G.M. DeNicola, The Complex Interplay between Antioxidants and ROS  
476 in Cancer, *Trends in Cell Biology* 30 (2020) 440-451.
- 477 16. D. Trachootham, J. Alexandre, P. Huang, Targeting cancer cells by ROS-  
478 mediated mechanisms: A radical therapeutic approach?, *Nature Reviews Drug  
479 Discovery* 8 (2009) 579-591.
- 480 17. J.L. Roh, H. Jang, E.H. Kim, D. Shin, Targeting of the Glutathione, Thioredoxin,  
481 and Nrf2 Antioxidant Systems in Head and Neck Cancer, *Antioxidants and Redox  
482 Signaling* 27 (2017) 106-114.

- 483 18. C. Glorieux, P.B. Calderon, Catalase, a remarkable enzyme: Targeting the oldest  
484 antioxidant enzyme to find a new cancer treatment approach, *Biological*  
485 *Chemistry* 398 (2017) 1095-1108.
- 486 19. G. Chakrabarti, Z.R. Moore, X. Luo, M. Ilcheva, A. Ali, M. Padanad, Y. Zhou, Y.  
487 Xie, S. Burma, P.P. Scaglioni, L.C. Cantley, R.J. DeBerardinis, A.C. Kimmelman,  
488 C.A. Lyssiotis, D.A. Boothman, Targeting glutamine metabolism sensitizes  
489 pancreatic cancer to PARP-driven metabolic catastrophe induced by  $\beta$ -  
490 lapachone, *Cancer Metab.* 3 (2015) 12.
- 491 20. A.K. Jaiswal, Regulation of genes encoding NAD(P)H:quinone oxidoreductases,  
492 *Free Radical Biology and Medicine* 29 (2000) 254-262.
- 493 21. L.S. Li, S. Reddy, Z.H. Lin, S. Liu, H. Park, S.G. Chun, W.G. Bornmann, J.  
494 Thibodeaux, J. Yan, G. Chakrabarti, X.-J. Xie, B.D. Sumer, D.A. Boothman, J.S.  
495 Yordy, NQO1-Mediated tumor-selective lethality and radiosensitization for head  
496 and neck cancer, *Molecular Cancer Therapeutics* 15 (2016) 1757-1767.
- 497 22. D.E. Gerber, M.S. Beg, F. Fattah, A.E. Frankel, O. Fatunde, Y. Arriaga, J.E.  
498 Dowell, A. Bisen, R.D. Leff, C.C. Meek, W.C. Putnam, R.R. Kallem, I.  
499 Subramaniyan, Y. Dong, J. Bolluyt, V. Sarode, X. Luo, Y. Xie, B. Schwartz, D.A.  
500 Boothman, Phase 1 study of ARQ 761, a  $\beta$ -lapachone analogue that promotes  
501 NQO1-mediated programmed cancer cell necrosis, *British Journal of Cancer* 119  
502 (2018) 928-936.
- 503 23. E.A. Motea, X. Huang, N. Singh, J.A. Kilgore, N.S. Williams, X.J. Xie, D.E.  
504 Gerber, M.S. Beg, E.A. Bey, D.A. Boothman, NQO1-dependent, tumor-selective

- 505 radiosensitization of non-small cell lung cancers, *Clinical Cancer Research* 25  
506 (2019) 2601-2609.
- 507 24. E.A. Bey, M.S. Bentle, K.E. Reinicke, Y. Dong, C.R. Yang, L. Girard, J.D. Minna,  
508 W.G. Bornmann, J. Gao, D.A. Boothman, An NQO1- and PARP-1-mediated cell  
509 death pathway induced in non-small-cell lung cancer cells by  $\beta$ -lapachone, *Proc.*  
510 *Natl. Acad. Sci. U S A* 104 (2007) 11832-11837.
- 511 25. E.A. Bey, K.E. Reinicke, M.C. Srougi, M. Varnes, V.E. Anderson, J.J. Pink, L.S.  
512 Li, M. Patel, L. Cao, Z. Moore, A. Rommel, M. Boatman, C. Lewis, D.M. Euhus,  
513 W.G. Bornmann, D.J. Buchsbaum, D.R. Spitz, J. Gao, D.A. Boothman, Catalase  
514 abrogates  $\beta$ -lapachone-induced PARP1 hyperactivation-directed programmed  
515 necrosis in NQO1-positive breast cancers, *Molecular Cancer Therapeutics* 12  
516 (2013) 2110-2120.
- 517 26. X. Huang, Y. Dong, E.A. Bey, J.A. Kilgore, J.S. Bair, L.S. Li, M. Patel, E.I.  
518 Parkinson, Y. Wang, N.S.. Williams, J. Gao, P.J. Hergenrother, D.A. Boothman,  
519 An NQO1 Substrate with Potent Antitumor Activity That Selectively Kills by  
520 PARP1-Induced Programmed Necrosis, *Cancer Research* 72 (2012) 3038-3047.
- 521 27. L. Cao, L.S. Li, C. Spruell, L. Xiao, G. Chakrabarti, E.A. Bey, K.E. Reinicke, M.C.  
522 Srougi, Z. Moore, Y. Dong, P. Vo, W. Kabbani, C.R. Yang, X. Wang, F. Fattah,  
523 J.C. Morales, E.A. Motea, W.G. Bornmann, J.S. Yordy, D.A. Boothman, Tumor-  
524 selective, futile redox cycle-induced bystander effects elicited by NQO1  
525 bioactivatable radiosensitizing drugs in triple-negative breast cancers,  
526 *Antioxidants and Redox Signaling* 21 (2014) 237-250.

- 527 28. L. Torrente, N. Prieto-Farigua, A. Falzone, C.M. Elkins, D.A. Boothman, E.B.  
528 Haura, G.M. DeNicola, Inhibition of TXNRD or SOD1 overcomes NRF2-mediated  
529 resistance to  $\beta$ -lapachone, *Redox Biology* 30 (2020) 101440.
- 530 29. N. Bansal, J. Mims, J.G. Kuremsky, A.L. Olex, W. Zhao, L. Yin, R. Wani, J. Qian,  
531 B. Center, G.S. Marrs, M. Porosnicu, J.S. Fetrow, A.W. Tsang, C.M. Furdui,  
532 Broad phenotypic changes associated with gain of radiation resistance in head  
533 and neck squamous cell cancer, *Antioxidants and Redox Signaling* 21(2014) 221-  
534 236.
- 535 30. J.E. Lewis, T.E. Forshaw, D.A. Boothman, C.M. Furdui, M.L. Kemp, Personalized  
536 Genome-Scale Metabolic Models Identify Targets of Redox Metabolism in  
537 Radiation-Resistant Tumors, *Cell Systems* 12 (2021) 68-81.
- 538 31. S.V. Puram, I. Tirosh, A.S. Parikh, A.P. Patel, K. Yizhak, S. Gillespie, C. Rodman,  
539 C.L. Luo, E.A. Mroz, K.S. Emerick, D.G. Deschler, M.A. Varvares, R.  
540 Mylvaganam, O. Rozenblatt-Rosen, J.W. Rocco, W.C. Faquin, D.T. Lin, A.  
541 Regev, B.E. Bernstein, Single-Cell Transcriptomic Analysis of Primary and  
542 Metastatic Tumor Ecosystems in Head and Neck Cancer, *Cell* 171 (2017) 1611-  
543 1624.
- 544 32. I. Tirosh, B. Izar, S.M. Prakadan, M.H. Wadsworth 2<sup>nd</sup>, D. Treacy, J.J. Trombetta,  
545 A. Rotem, C. Rodman, C. Lian, G. Murphy, M. Fallahi-Sichani, K. Dutton-  
546 Register, J.R. Lin, O. Cohen, P. Shah, D. Lu, A.S. Genshaft, T.K. Hughes,  
547 C.G.K. Ziegler, S.W. Kazer, A. Gaillard, K.E. Kolb, A.C. Villani, C.M.  
548 Johannessen, A.Y. Andreev, E.M.V. Allen, M. Bertagnolli, P.K. Sorger, R.J.  
549 Sullivan, K.T. Flaherty, D.T. Frederick, J. Jane-Valbuena, C.H. Yoon, O.

- 550 Rozenblatt-Rosen, A.K. Shalek, A. Regev, L.A. Garraway, Dissecting the  
551 multicellular ecosystem of metastatic melanoma by single-cell RNA-seq, *Science*  
552 352 (2016) 189-196.
- 553 33. Z. Xiao, Z. Dai, J.W. Locasale, Metabolic landscape of the tumor  
554 microenvironment at single cell resolution, *Nature Communications* 10 (2019)  
555 3763.
- 556 34. K. Hrovatin, D.S. Fischer, F.J. Theis, Toward modeling metabolic state from  
557 single-cell transcriptomics, *Molecular Metabolism* 57 (2022) 101396.
- 558 35. B. Schwanhäusser, D. Busse, N. Li, G. Dittmar, J. Schuchhardt, J. Wolf, W. Chen,  
559 M. Selbach, Global quantification of mammalian gene expression control, *Nature*  
560 473 (2011) 337-342.
- 561 36. L.E. Kippner, N.A. Finn, S. Shukla, M.L. Kemp, Systemic remodeling of the redox  
562 regulatory network due to RNAi perturbations of glutaredoxin 1, thioredoxin 1, and  
563 glucose-6-phosphate dehydrogenase, *BMC Syst. Biol.* 5 (2011) 164.
- 564 37. W. Zhao, L. Jiang, T. Fang, F. Fang, Y. Liu, Y. Zhao, Y. You, H. Zhou, X. Su, J.  
565 Wang, S. Liu, Y. Chen, J. Wan, X. Huang,  $\beta$ -Lapachone Selectively Kills  
566 Hepatocellular Carcinoma Cells by Targeting NQO1 to Induce Extensive DNA  
567 Damage and PARP1 Hyperactivation, *Frontiers in Oncology* 11 (2021) 747282.
- 568 38. E. Panieri, L. Saso, Inhibition of the NRF2/KEAP1 Axis: A Promising Therapeutic  
569 Strategy to Alter Redox Balance of Cancer Cells, *Antioxidants & Redox Signaling*  
570 34 (2021) 1428-1483.

- 571 39. S.L. Winski, Y. Koutalos, D.L. Bentley, D. Ross, Subcellular Localization of  
572 NAD(P)H:quinone Oxidoreductase 1 in Human Cancer Cells, *Cancer Research*  
573 62 (2002) 1420-1424.
- 574 40. J. Ma, C. Lim, J.R. Sacher, B.V. Houten, W. Qian, P. Wipf, Mitochondrial targeted  
575  $\beta$ -lapachone induces mitochondrial dysfunction and catastrophic vacuolization in  
576 cancer cells, *Bioorg. Med. Chem. Lett.* 25 (2015) 4828-4833.
- 577 41. J.R. Thiagarajah, J. Chang, J.A. Goettel, A.S. Verkman, W.I. Lencer, Aquaporin-3  
578 mediates hydrogen peroxide-dependent responses to environmental stress in  
579 colonic epithelia, *Proc. Natl. Acad. Sci. U S A* 114 (2017) 568-573.
- 580 42. G.P. Bienert, F. Chaumont, Aquaporin-facilitated transmembrane diffusion of  
581 hydrogen peroxide, *Biochimica et Biophysica Acta* 1840 (2014) 1596-1604.
- 582 43. G.P. Bienert, A.L.B. Møller, K.A. Kristiansen, A. Schulz, I.M. Møller, J.K.  
583 Schjoerring, T.P. Jahn, Specific aquaporins facilitate the diffusion of hydrogen  
584 peroxide across membranes, *Journal of Biological Chemistry* 282 (2007) 1183-  
585 1192.
- 586 44. S. Watanabe, C.S. Moniaga, S. Nielsen, M. Hara-Chikuma, Aquaporin-9  
587 facilitates membrane transport of hydrogen peroxide in mammalian cells,  
588 *Biochem. Biophys. Res. Commun.* 471 (2016) 191-197.
- 589 45. D. Lähnemann, J. Köster, E. Szczurek, D.J. McCarthy, S.C. Hicks, M.D.  
590 Robinson, C.A. Vallejos, K.R. Campbell, N. Beerenwinkel, A. Mahfouz, L. Pinello,  
591 P. Skums, A. Stamatakis, C.S.O. Attolini, S. Aparicio, J. Baaijens, M. Balvert, B.  
592 de Barbanson, A. Cappuccio, G. Corleone, B.E. Dutilh, M. Florescu, V. Guryev, R.  
593 Holmer, K. Jahn, T.J. Lobo, E.M. Keizer, I. Khatri, S.M. Kielbasa, J.O. Korbel,

- 594 A.M. Kozlov, T.H. Kuo, B.P.F. Lelieveldt, I.I. Mandoiu, J.C. Marioni, T. Marschall,  
595 F. Molder, A. Niknejad, L. Raczkowski, M. Reinders, J. de Ridder, A.E. Saliba, A.  
596 Somarakis, O. Stegle, F.J. Theis, H. Yang, A. Zelikovsky, A.C. McHardy, B.J.  
597 Raphael, S.P. Shah, A. Schonhuth, Eleven grand challenges in single-cell data  
598 science, *Genome Biology* 21 (2020) 31.
- 599 46. T.H. Kim, X. Zhou, M. Chen, Demystifying “drop-outs” in single-cell UMI data,  
600 *Genome Biology* 21 (2020) 196.
- 601 47. P. Qiu, Embracing the dropouts in single-cell RNA-seq analysis, *Nature*  
602 *Communications* 11 (2020) 1169.
